# Supplementary material
Source: publisher figshare collection journal article supplement (https://sage.figshare.com/ndownloader/files/20502684)
Supplement: Supplementary file 1 [file 20502684]

* Encoding: UTF-8.
*** READING SPEED BASED ON READING SPEED OF PROMPTS CREATION ***

COMPUTE avg_wps.prompts=MEAN(wps.1A.prompt,wps.1B.prompt,wps.1C.prompt,wps.1D.prompt,wps.1E.prompt,wps.2F.prompt,wps.2G.prompt,wps.2H.prompt,wps.2I.prompt,wps.2J.prompt,wps.3K.prompt,wps.3L.prompt,wps.3M.prompt,wps.3N.prompt,wps.3O.prompt).
EXECUTE.

COMPUTE avg_wps.endings=MEAN(wps.1A.ending,wps.1B.ending,wps.1C.ending,wps.1D.ending,wps.1E.ending,wps.2F.ending,wps.2G.ending,wps.2H.ending,wps.2I.ending,wps.2J.ending,wps.3K.ending,wps.3L.ending,wps.3M.ending,wps.3N.ending,wps.3O.ending).
EXECUTE.

COMPUTE expected.time.1A.ending=(word_count.1A.ending/avg_wps.prompts)*1000.
COMPUTE expected.time.1B.ending=(word_count.1B.ending/avg_wps.prompts)*1000.
COMPUTE expected.time.1C.ending=(word_count.1C.ending/avg_wps.prompts)*1000.
COMPUTE expected.time.1D.ending=(word_count.1D.ending/avg_wps.prompts)*1000.
COMPUTE expected.time.1E.ending=(word_count.1E.ending/avg_wps.prompts)*1000.
COMPUTE expected.time.2F.ending=(word_count.2F.ending/avg_wps.prompts)*1000.
COMPUTE expected.time.2G.ending=(word_count.2G.ending/avg_wps.prompts)*1000.
COMPUTE expected.time.2H.ending=(word_count.2H.ending/avg_wps.prompts)*1000.
COMPUTE expected.time.2I.ending=(word_count.2I.ending/avg_wps.prompts)*1000.
COMPUTE expected.time.2J.ending=(word_count.2J.ending/avg_wps.prompts)*1000.
COMPUTE expected.time.3K.ending=(word_count.3K.ending/avg_wps.prompts)*1000.
COMPUTE expected.time.3L.ending=(word_count.3L.ending/avg_wps.prompts)*1000.
COMPUTE expected.time.3M.ending=(word_count.3M.ending/avg_wps.prompts)*1000.
COMPUTE expected.time.3N.ending=(word_count.3N.ending/avg_wps.prompts)*1000.
COMPUTE expected.time.3O.ending=(word_count.3O.ending/avg_wps.prompts)*1000.

EXECUTE.

COMPUTE diff_observ_sub_expected.1A=(latency.1A.ending-expected.time.1A.ending).
COMPUTE diff_observ_sub_expected.1B=(latency.1B.ending-expected.time.1B.ending).
COMPUTE diff_observ_sub_expected.1C=(latency.1C.ending-expected.time.1C.ending).
COMPUTE diff_observ_sub_expected.1D=(latency.1D.ending-expected.time.1D.ending).
COMPUTE diff_observ_sub_expected.1E=(latency.1E.ending-expected.time.1E.ending).
COMPUTE diff_observ_sub_expected.2F=(latency.2F.ending-expected.time.2F.ending).
COMPUTE diff_observ_sub_expected.2G=(latency.2G.ending-expected.time.2G.ending).
COMPUTE diff_observ_sub_expected.2H=(latency.2H.ending-expected.time.2H.ending).
COMPUTE diff_observ_sub_expected.2I=(latency.2I.ending-expected.time.2I.ending).
COMPUTE diff_observ_sub_expected.2J=(latency.2J.ending-expected.time.2J.ending).
COMPUTE diff_observ_sub_expected.3K=(latency.3K.ending-expected.time.3K.ending).
COMPUTE diff_observ_sub_expected.3L=(latency.3L.ending-expected.time.3L.ending).
COMPUTE diff_observ_sub_expected.3M=(latency.3M.ending-expected.time.3M.ending).
COMPUTE diff_observ_sub_expected.3N=(latency.3N.ending-expected.time.3N.ending).
COMPUTE diff_observ_sub_expected.3O=(latency.3O.ending-expected.time.3O.ending).

EXECUTE.

IF retribution.1A.ending=0 diff_observ_sub_expected.UNDER.avg=MEAN(diff_observ_sub_expected.1A,diff_observ_sub_expected.1B,diff_observ_sub_expected.1C,diff_observ_sub_expected.1D,diff_observ_sub_expected.1E).
IF retribution.1A.ending=1 diff_observ_sub_expected.JUST.avg=MEAN(diff_observ_sub_expected.1A,diff_observ_sub_expected.1B,diff_observ_sub_expected.1C,diff_observ_sub_expected.1D,diff_observ_sub_expected.1E).
IF retribution.1A.ending=2 diff_observ_sub_expected.OVER.avg=MEAN(diff_observ_sub_expected.1A,diff_observ_sub_expected.1B,diff_observ_sub_expected.1C,diff_observ_sub_expected.1D,diff_observ_sub_expected.1E).

IF retribution.2F.ending=0 diff_observ_sub_expected.UNDER.avg=MEAN(diff_observ_sub_expected.2F,diff_observ_sub_expected.2G,diff_observ_sub_expected.2H,diff_observ_sub_expected.2I,diff_observ_sub_expected.2J).
IF retribution.2F.ending=1 diff_observ_sub_expected.JUST.avg=MEAN(diff_observ_sub_expected.2F,diff_observ_sub_expected.2G,diff_observ_sub_expected.2H,diff_observ_sub_expected.2I,diff_observ_sub_expected.2J).
IF retribution.2F.ending=2 diff_observ_sub_expected.OVER.avg=MEAN(diff_observ_sub_expected.2F,diff_observ_sub_expected.2G,diff_observ_sub_expected.2H,diff_observ_sub_expected.2I,diff_observ_sub_expected.2J).

IF retribution.3K.ending=0 diff_observ_sub_expected.UNDER.avg=MEAN(diff_observ_sub_expected.3K,diff_observ_sub_expected.3L,diff_observ_sub_expected.3M,diff_observ_sub_expected.3N,diff_observ_sub_expected.3O).
IF retribution.3K.ending=1 diff_observ_sub_expected.JUST.avg=MEAN(diff_observ_sub_expected.3K,diff_observ_sub_expected.3L,diff_observ_sub_expected.3M,diff_observ_sub_expected.3N,diff_observ_sub_expected.3O).
IF retribution.3K.ending=2 diff_observ_sub_expected.OVER.avg=MEAN(diff_observ_sub_expected.3K,diff_observ_sub_expected.3L,diff_observ_sub_expected.3M,diff_observ_sub_expected.3N,diff_observ_sub_expected.3O).

EXECUTE.

IF retribution.1A.ending=0 like_dislike.UNDER.avg=MEAN(like_dislike.1A.ending,like_dislike.1B.ending,like_dislike.1C.ending,like_dislike.1D.ending,like_dislike.1E.ending).
IF retribution.1A.ending=1 like_dislike.JUST.avg=MEAN(like_dislike.1A.ending,like_dislike.1B.ending,like_dislike.1C.ending,like_dislike.1D.ending,like_dislike.1E.ending).
IF retribution.1A.ending=2 like_dislike.OVER.avg=MEAN(like_dislike.1A.ending,like_dislike.1B.ending,like_dislike.1C.ending,like_dislike.1D.ending,like_dislike.1E.ending).

IF retribution.2F.ending=0 like_dislike.UNDER.avg=MEAN(like_dislike.2F.ending,like_dislike.2G.ending,like_dislike.2H.ending,like_dislike.2I.ending,like_dislike.2J.ending).
IF retribution.2F.ending=1 like_dislike.JUST.avg=MEAN(like_dislike.2F.ending,like_dislike.2G.ending,like_dislike.2H.ending,like_dislike.2I.ending,like_dislike.2J.ending).
IF retribution.2F.ending=2 like_dislike.OVER.avg=MEAN(like_dislike.2F.ending,like_dislike.2G.ending,like_dislike.2H.ending,like_dislike.2I.ending,like_dislike.2J.ending).

IF retribution.3K.ending=0 like_dislike.UNDER.avg=MEAN(like_dislike.3K.ending,like_dislike.3L.ending,like_dislike.3M.ending,like_dislike.3N.ending,like_dislike.3O.ending).
IF retribution.3K.ending=1 like_dislike.JUST.avg=MEAN(like_dislike.3K.ending,like_dislike.3L.ending,like_dislike.3M.ending,like_dislike.3N.ending,like_dislike.3O.ending).
IF retribution.3K.ending=2 like_dislike.OVER.avg=MEAN(like_dislike.3K.ending,like_dislike.3L.ending,like_dislike.3M.ending,like_dislike.3N.ending,like_dislike.3O.ending).

EXECUTE.

IF retribution.1A.ending=0 ENJOYMENT.UNDER.avg=MEAN(S1A.Enjoyment,S1B.Enjoyment,S1C.Enjoyment,S1D.Enjoyment,S1E.Enjoyment).
IF retribution.1A.ending=1 ENJOYMENT.JUST.avg=MEAN(S1A.Enjoyment,S1B.Enjoyment,S1C.Enjoyment,S1D.Enjoyment,S1E.Enjoyment).
IF retribution.1A.ending=2 ENJOYMENT.OVER.avg=MEAN(S1A.Enjoyment,S1B.Enjoyment,S1C.Enjoyment,S1D.Enjoyment,S1E.Enjoyment).

IF retribution.2F.ending=0 ENJOYMENT.UNDER.avg=MEAN(S2F.Enjoyment,S2G.Enjoyment,S2H.Enjoyment,S2I.Enjoyment,S2J.Enjoyment).
IF retribution.2F.ending=1 ENJOYMENT.JUST.avg=MEAN(S2F.Enjoyment,S2G.Enjoyment,S2H.Enjoyment,S2I.Enjoyment,S2J.Enjoyment).
IF retribution.2F.ending=2 ENJOYMENT.OVER.avg=MEAN(S2F.Enjoyment,S2G.Enjoyment,S2H.Enjoyment,S2I.Enjoyment,S2J.Enjoyment).

IF retribution.3K.ending=0 ENJOYMENT.UNDER.avg=MEAN(S3K.Enjoyment,S3L.Enjoyment,S3M.Enjoyment,S3N.Enjoyment,S3O.Enjoyment).
IF retribution.3K.ending=1 ENJOYMENT.JUST.avg=MEAN(S3K.Enjoyment,S3L.Enjoyment,S3M.Enjoyment,S3N.Enjoyment,S3O.Enjoyment).
IF retribution.3K.ending=2 ENJOYMENT.OVER.avg=MEAN(S3K.Enjoyment,S3L.Enjoyment,S3M.Enjoyment,S3N.Enjoyment,S3O.Enjoyment).

EXECUTE.

IF retribution.1A.ending=0 APPRECIATION.UNDER.avg=MEAN(S1A.Appreciation,S1B.Appreciation,S1C.Appreciation,S1D.Appreciation,S1E.Appreciation).
IF retribution.1A.ending=1 APPRECIATION.JUST.avg=MEAN(S1A.Appreciation,S1B.Appreciation,S1C.Appreciation,S1D.Appreciation,S1E.Appreciation).
IF retribution.1A.ending=2 APPRECIATION.OVER.avg=MEAN(S1A.Appreciation,S1B.Appreciation,S1C.Appreciation,S1D.Appreciation,S1E.Appreciation).

IF retribution.2F.ending=0 APPRECIATION.UNDER.avg=MEAN(S2F.Appreciation,S2G.Appreciation,S2H.Appreciation,S2I.Appreciation,S2J.Appreciation).
IF retribution.2F.ending=1 APPRECIATION.JUST.avg=MEAN(S2F.Appreciation,S2G.Appreciation,S2H.Appreciation,S2I.Appreciation,S2J.Appreciation).
IF retribution.2F.ending=2 APPRECIATION.OVER.avg=MEAN(S2F.Appreciation,S2G.Appreciation,S2H.Appreciation,S2I.Appreciation,S2J.Appreciation).

IF retribution.3K.ending=0 APPRECIATION.UNDER.avg=MEAN(S3K.Appreciation,S3L.Appreciation,S3M.Appreciation,S3N.Appreciation,S3O.Appreciation).
IF retribution.3K.ending=1 APPRECIATION.JUST.avg=MEAN(S3K.Appreciation,S3L.Appreciation,S3M.Appreciation,S3N.Appreciation,S3O.Appreciation).
IF retribution.3K.ending=2 APPRECIATION.OVER.avg=MEAN(S3K.Appreciation,S3L.Appreciation,S3M.Appreciation,S3N.Appreciation,S3O.Appreciation).

EXECUTE.

COMPUTE diff_observ_sub_expcted.allendings.avg=MEAN(diff_observ_sub_expected.UNDER.avg,diff_observ_sub_expected.JUST.avg,diff_observ_sub_expected.OVER.avg).
COMPUTE liking.allendings.avg=MEAN(like_dislike.UNDER.avg,like_dislike.JUST.avg,like_dislike.OVER.avg).
COMPUTE enjoyment.allendings.avg=MEAN(ENJOYMENT.UNDER.avg,ENJOYMENT.JUST.avg,ENJOYMENT.OVER.avg).
COMPUTE appreciation.allendings.avg=MEAN(APPRECIATION.UNDER.avg,APPRECIATION.JUST.avg,APPRECIATION.OVER.avg).

EXECUTE.

*** HYPOTHESES TESTS ***
    
GLM like_dislike.UNDER.avg like_dislike.JUST.avg like_dislike.OVER.avg 
    diff_observ_sub_expected.UNDER.avg diff_observ_sub_expected.JUST.avg 
    diff_observ_sub_expected.OVER.avg ENJOYMENT.UNDER.avg ENJOYMENT.JUST.avg ENJOYMENT.OVER.avg 
    APPRECIATION.UNDER.avg APPRECIATION.JUST.avg APPRECIATION.OVER.avg
  /WSFACTOR=Retribution 3 Polynomial 
  /MEASURE=Liking Latency Enjoyment Appreciation 
  /METHOD=SSTYPE(3)
  /EMMEANS=TABLES(OVERALL) 
  /EMMEANS=TABLES(Retribution) 
  /PRINT=DESCRIPTIVE ETASQ
  /CRITERIA=ALPHA(.05)
  /WSDESIGN=Retribution.

CORRELATIONS
  /VARIABLES=diff_observ_sub_expected.UNDER.avg diff_observ_sub_expected.JUST.avg 
    diff_observ_sub_expected.OVER.avg like_dislike.UNDER.avg like_dislike.JUST.avg 
    like_dislike.OVER.avg ENJOYMENT.UNDER.avg ENJOYMENT.JUST.avg ENJOYMENT.OVER.avg 
    APPRECIATION.UNDER.avg APPRECIATION.JUST.avg APPRECIATION.OVER.avg
  /PRINT=TWOTAIL NOSIG
  /MISSING=PAIRWISE.

CORRELATIONS
  /VARIABLES=diff_observ_sub_expcted.allendings.avg liking.allendings.avg enjoyment.allendings.avg 
    appreciation.allendings.avg
  /PRINT=TWOTAIL NOSIG
  /MISSING=PAIRWISE.

REGRESSION
  /DESCRIPTIVES MEAN STDDEV CORR SIG N
  /MISSING LISTWISE
  /STATISTICS COEFF OUTS CI(95) R ANOVA CHANGE ZPP
  /CRITERIA=PIN(.05) POUT(.10)
  /NOORIGIN 
  /DEPENDENT like_dislike.UNDER.avg
  /METHOD=ENTER ENJOYMENT.UNDER.avg APPRECIATION.UNDER.avg.

REGRESSION
  /DESCRIPTIVES MEAN STDDEV CORR SIG N
  /MISSING LISTWISE
  /STATISTICS COEFF OUTS CI(95) R ANOVA CHANGE ZPP
  /CRITERIA=PIN(.05) POUT(.10)
  /NOORIGIN 
  /DEPENDENT like_dislike.JUST.avg
  /METHOD=ENTER ENJOYMENT.JUST.avg APPRECIATION.JUST.avg.

REGRESSION
  /DESCRIPTIVES MEAN STDDEV CORR SIG N
  /MISSING LISTWISE
  /STATISTICS COEFF OUTS CI(95) R ANOVA CHANGE ZPP
  /CRITERIA=PIN(.05) POUT(.10)
  /NOORIGIN 
  /DEPENDENT like_dislike.OVER.avg
  /METHOD=ENTER ENJOYMENT.OVER.avg APPRECIATION.OVER.avg.
